# Supplementary material for: The N-recognin UBR4 of the N-end rule pathway is required for neurogenesis and homeostasis of cell surface proteins
Source: PubMed Central journal article supplement (PMC6114712; doi:10.1371/journal.pone.0202260), 2018-08-29
Supplement: pone.0202260.s002.pdf [file pone.0202260.s002.pdf]

Table S1. The list of 71 membrane proteins down-regulated in *UBR4*<sup>-/-</sup> MEF cells compared with +/+ MEFs ( $p \leq 0.01$ ).

| Accession   | Symbol                      | Entrez gene name                                                                             | STN    | p-value | Type(s)                |
|-------------|-----------------------------|----------------------------------------------------------------------------------------------|--------|---------|------------------------|
| IPI00468633 | SLC6A9                      | solute carrier family 6 (neurotransmitter transporter, glycine), member 9                    | -1.626 | 0.010   | transporter            |
| IPI00115117 | STOML2                      | stomatin (EPB72)-like 2                                                                      | -1.626 | 0.010   | other                  |
| IPI00331524 | ERLIN1                      | ER lipid raft associated 1                                                                   | -1.626 | 0.010   | other                  |
| IPI00408489 | DSCAML1                     | Down syndrome cell adhesion molecule like 1                                                  | -1.626 | 0.010   | other                  |
| IPI00323822 | RRAS2                       | related RAS viral (r-ras) oncogene homolog 2                                                 | -1.683 | 0.010   | enzyme                 |
| IPI00122971 | NCAM1                       | neural cell adhesion molecule 1                                                              | -1.694 | 0.010   | other                  |
| IPI00110588 | MSN                         | moesin                                                                                       | -1.727 | 0.009   | other                  |
| IPI00648802 | EPHB2                       | EPH receptor B2                                                                              | -1.727 | 0.009   | kinase                 |
| IPI00123040 | PTPRK                       | protein tyrosine phosphatase, receptor type, K                                               | -1.809 | 0.009   | phosphatase            |
| IPI00230395 | ANXA1                       | annexin A1                                                                                   | -1.822 | 0.008   | other                  |
| IPI00122273 | DAG1                        | dystroglycan 1 (dystrophin-associated glycoprotein 1)                                        | -1.827 | 0.008   | transmembrane receptor |
| IPI00131540 | VTI1A                       | vesicle transport through interaction with t-SNAREs homolog 1A (yeast)                       | -1.827 | 0.008   | transporter            |
| IPI00228617 | GNAI2                       | guanine nucleotide binding protein (G protein), alpha inhibiting activity polypeptide 2      | -1.852 | 0.008   | enzyme                 |
| IPI00312509 | AXL                         | AXL receptor tyrosine kinase                                                                 | -1.987 | 0.007   | kinase                 |
| IPI00129298 | PALM                        | paralemmin                                                                                   | -1.987 | 0.007   | other                  |
| IPI00129220 | EPHA2                       | EPH receptor A2                                                                              | -2.117 | 0.006   | kinase                 |
| IPI00121827 | PDGFRB                      | platelet-derived growth factor receptor, beta polypeptide                                    | -2.190 | 0.006   | kinase                 |
| IPI00664442 | SLC4A7                      | solute carrier family 4, sodium bicarbonate cotransporter, member 7                          | -2.196 | 0.006   | transporter            |
| IPI00313884 | PODXL                       | podocalyxin-like                                                                             | -2.211 | 0.006   | kinase                 |
| IPI00331175 | SLC12A7                     | solute carrier family 12 (potassium/chloride transporters), member 7                         | -2.211 | 0.006   | transporter            |
| IPI00120930 | PLSCR1                      | phospholipid scramblase 1                                                                    | -2.211 | 0.006   | enzyme                 |
| IPI00270376 | CXADR                       | coxsackie virus and adenovirus receptor                                                      | -2.211 | 0.006   | transmembrane receptor |
| IPI00123996 | NRP1<br>(includes EG:18186) | neuropilin 1                                                                                 | -2.304 | 0.005   | transmembrane receptor |
| IPI00123183 | AQP1                        | aquaporin 1 (Colton blood group)                                                             | -2.304 | 0.005   | transporter            |
| IPI00124221 | ATP1B3                      | ATPase, Na <sup>+</sup> /K <sup>+</sup> transporting, beta 3 polypeptide                     | -2.366 | 0.005   | transporter            |
| IPI00416751 | SLC29A1                     | solute carrier family 29 (nucleoside transporters), member 1                                 | -2.413 | 0.005   | transporter            |
| IPI00137311 | PLXNA1                      | plexin A1                                                                                    | -2.485 | 0.005   | transmembrane receptor |
| IPI00405742 | PLXNB2                      | plexin B2                                                                                    | -2.550 | 0.004   | transmembrane receptor |
| IPI00132474 | ITGB1                       | integrin, beta 1 (fibronectin receptor, beta polypeptide, antigen CD29 includes MDF2, MSK12) | -2.550 | 0.004   | transmembrane receptor |
| IPI00121634 | SLC7A1                      | solute carrier family 7 (cationic amino acid transporter, y <sup>+</sup> system), member 1   | -2.559 | 0.004   | transporter            |
| IPI00130648 | VLDLR                       | very low density lipoprotein receptor                                                        | -2.575 | 0.004   | transporter            |

|             |         |                                                                                         |        |       |                            |
|-------------|---------|-----------------------------------------------------------------------------------------|--------|-------|----------------------------|
| IPI00117181 | FLOT1   | flotillin 1                                                                             | -2.589 | 0.004 | other                      |
| IPI00118569 | GNA13   | guanine nucleotide binding protein (G protein), alpha 13                                | -2.589 | 0.004 | enzyme                     |
| IPI00308971 | IGF2R   | insulin-like growth factor 2 receptor                                                   | -2.608 | 0.004 | transmembrane receptor     |
| IPI00330539 | KIRREL  | kin of IRRE like (Drosophila)                                                           | -2.708 | 0.004 | other                      |
| IPI00468236 | ANO6    | anoctamin 6                                                                             | -2.708 | 0.004 | ion channel                |
| IPI00135130 | SLC1A4  | solute carrier family 1 (glutamate/neutral amino acid transporter), member 4            | -2.725 | 0.004 | transporter                |
| IPI00124830 | CD47    | CD47 molecule                                                                           | -2.728 | 0.004 | other                      |
| IPI00465786 | TLN1    | talin 1                                                                                 | -2.756 | 0.004 | other                      |
| IPI00754549 | FLOT2   | flotillin 2                                                                             | -2.855 | 0.004 | other                      |
| IPI00420589 | IGSF3   | immunoglobulin superfamily, member 3                                                    | -3.256 | 0.003 | other                      |
| IPI00311682 | ATP1A1  | ATPase, Na <sup>+</sup> /K <sup>+</sup> transporting, alpha 1 polypeptide               | -3.359 | 0.003 | transporter                |
| IPI00129253 | LY75    | lymphocyte antigen 75                                                                   | -3.406 | 0.003 | other                      |
| IPI00117829 | CAV1    | caveolin 1, caveolae protein, 22kDa                                                     | -3.463 | 0.003 | other                      |
| IPI00113798 | SNAP23  | synaptosomal-associated protein, 23kDa                                                  | -3.501 | 0.003 | transporter                |
| IPI00115976 | ITGA5   | integrin, alpha 5 (fibronectin receptor, alpha polypeptide)                             | -3.532 | 0.003 | other                      |
| IPI00308691 | SLC2A1  | solute carrier family 2 (facilitated glucose transporter), member 1                     | -3.657 | 0.002 | transporter                |
| IPI00115546 | GNAO1   | guanine nucleotide binding protein (G protein), alpha activating activity polypeptide O | -3.657 | 0.002 | enzyme                     |
| IPI00223769 | CD44    | CD44 molecule (Indian blood group)                                                      | -3.706 | 0.002 | enzyme                     |
| IPI00113869 | BSG     | basigin (Ok blood group)                                                                | -3.720 | 0.002 | transporter                |
| IPI00125832 | CAV2    | caveolin 2                                                                              | -3.720 | 0.002 | other                      |
| IPI00128152 | Abcb1b  | ATP-binding cassette, sub-family B (MDR/TAP), member 1B                                 | -3.735 | 0.002 | transporter                |
| IPI00138716 | RAP2B   | RAP2B, member of RAS oncogene family                                                    | -3.735 | 0.002 | enzyme                     |
| IPI00875340 | SLC1A5  | solute carrier family 1 (neutral amino acid transporter), member 5                      | -4.118 | 0.002 | transporter                |
| IPI00321753 | GPRC5A  | G protein-coupled receptor, family C, group 5, member A                                 | -4.118 | 0.002 | G-protein coupled receptor |
| IPI00137194 | SLC16A1 | solute carrier family 16, member 1 (monocarboxylic acid transporter 1)                  | -4.434 | 0.002 | transporter                |
| IPI00137336 | GPC1    | glypican 1                                                                              | -4.581 | 0.001 | transmembrane receptor     |
| IPI00653515 | LDLR    | low density lipoprotein receptor                                                        | -4.706 | 0.001 | transporter                |
| IPI00556827 | ATP2B1  | ATPase, Ca <sup>++</sup> transporting, plasma membrane 1                                | -5.103 | 0.001 | transporter                |
| IPI00126090 | ITGA3   | integrin, alpha 3 (antigen CD49C, alpha 3 subunit of VLA-3 receptor)                    | -5.111 | 0.001 | other                      |
| IPI00463589 | ATP2B4  | ATPase, Ca <sup>++</sup> transporting, plasma membrane 4                                | -5.336 | 0.001 | transporter                |
| IPI00135324 | SLC12A2 | solute carrier family 12 (sodium/potassium/chloride transporters), member 2             | -5.339 | 0.001 | transporter                |
| IPI00126834 | VCAM1   | vascular cell adhesion molecule 1                                                       | -5.630 | 0.001 | other                      |
| IPI00129395 | SLC7A5  | solute carrier family 7 (amino acid transporter light chain, L system), member 5        | -5.943 | 0.001 | transporter                |
| IPI00229703 | VAMP2   | vesicle-associated membrane protein 2 (synaptobrevin 2)                                 | -6.411 | 0.001 | other                      |

|             |                                 |                                                                                            |         |       |             |
|-------------|---------------------------------|--------------------------------------------------------------------------------------------|---------|-------|-------------|
| IPI00114641 | SLC3A2                          | solute carrier family 3 (activators of dibasic and neutral amino acid transport), member 2 | -7.015  | 0.001 | transporter |
| IPI00153809 | CD109                           | CD109 molecule                                                                             | -7.269  | 0.000 | other       |
| IPI00923039 | ABCC4<br>(includes<br>EG:10257) | ATP-binding cassette, sub-family C (CFTR/MRP), member 4                                    | -7.505  | 0.000 | transporter |
| IPI00129915 | ABCC1                           | ATP-binding cassette, sub-family C (CFTR/MRP), member 1                                    | -8.787  | 0.000 | transporter |
| IPI00132276 | VAMP3                           | vesicle-associated membrane protein 3 (cellubrevin)                                        | -10.074 | 0.000 | other       |
| IPI00124700 | TFRC                            | transferrin receptor (p90, CD71)                                                           | -12.338 | 0.000 | transporter |

---

\*STN : Signal to noise ratio generated by PLGEM analysis
